# Supplementary material
Source: Royal Society of Chemistry journal article supplement (doi:10.1039/d5cp04561d)
Supplement: d5cp04561d1.pdf [file d5cp04561d1.pdf]

Supporting Information

# Tuning MoS<sub>2</sub> Surface for the Catalytic Reactions of Li-O<sub>2</sub> Battery via. N-Doping and S-Vacancy Engineering

Bibhuti Bhusan Behera and Bhabani S. Mallik\*

Department of Chemistry, Indian Institute of Technology Hyderabad, Sangareddy-502284, Telangana, India

**Keywords:** MoS<sub>2</sub> catalyst, DFT calculation, Li-O<sub>2</sub> Batteries, Nitrogen Doping, Sulfur Vacancy

## Appendix S1 Supplementary Tables

**Table S1.** MoS<sub>2</sub> surfaces summary of equilibrium potential ( $U_{eq}$ ), discharge potential ( $U_{DC}$ ), charge potential ( $U_c$ ), discharge overpotential ( $\eta_{ORR}$ ), charge overpotential ( $\eta_{OER}$ ), and overall overpotentials ( $\eta_{total}$ ).

| System                                                   | $U_{eq}$ | $U_{DC}$ | $U_c$ | $\eta_{ORR}$ | $\eta_{OER}$ | $\eta_{total}$ |
|----------------------------------------------------------|----------|----------|-------|--------------|--------------|----------------|
| MoS <sub>2</sub>                                         | 1.85     | 1.44     | 2.67  | 0.41         | 0.82         | 1.23           |
| N <sub>dop</sub> -MoS <sub>2</sub>                       | 2.29     | 1.89     | 2.66  | 0.40         | 0.38         | 0.78           |
| S <sub>vac</sub> -MoS <sub>2</sub>                       | 2.97     | 2.24     | 3.33  | 0.73         | 0.36         | 1.09           |
| N <sub>dop</sub> -S <sub>vac</sub> -MoS <sub>2</sub> -N  | 2.14     | 1.84     | 2.49  | 0.30         | 0.34         | 0.64           |
| N <sub>dop</sub> -S <sub>vac</sub> -MoS <sub>2</sub> -Mo | 3.02     | 2.28     | 4.25  | 0.88         | 1.23         | 2.11           |

## Appendix S2 Additional Computational Details

### The INCAR for DFT calculations

ISTART = 0  
ISPIN = 2  
ENCUT = 550  
LWAVE = .FALSE.  
LCHARG = .FALSE.  
ALGO = Fast  
LREAL = Auto  
ISMEAR = 0  
SIGMA = 0.05

### CONTCAR file of pristine MoS<sub>2</sub> catalyst after relaxation

```
CONTCAR
1.0000000000000000
12.7689514160000002 0.0000000000000000
0.0000000000000000
-6.3844771805000002 11.0582354558000002
0.0000000000000000
0.0000000000000000 0.0000000000000000
19.0000000000000000
Mo S
16 32
Direct
0.1666666716546530 0.0833333358367483 0.1760301841052652
0.1666666716152250 0.3333333432565553 0.1760301841052652
0.1666666716313259 0.5833333135094989 0.1760301841052652
0.1666666715981577 0.8333333134235872 0.1760301841052652
0.4166666865344908 0.0833333358367483 0.1760301841052652
0.4166666864950699 0.3333333432565553 0.1760301841052652
0.4166666865894868 0.5833333135094989 0.1760301841052652
```

NELM = 90  
NELMIN = 6  
EDIFF = 1E-06  
NSW = 1000  
IBRION = 2  
ISIF = 2  
EDIFFG = -0.01  
IVDW = 11  
NCORE = 40

```
0.4166666864780026 0.8333333134235872 0.1760301841052652
0.6666666865344908 0.0833333358367483 0.1760301841052652
0.6666666864950699 0.3333333432565553 0.1760301841052652
0.6666666865894868 0.5833333135094989 0.1760301841052652
0.6666666864780026 0.8333333134235872 0.1760301841052652
0.9166666865344908 0.0833333358367483 0.1760301841052652
0.9166666864950699 0.3333333432565553 0.1760301841052652
0.9166666865894868 0.5833333135094989 0.1760301841052652
0.9166666864780026 0.8333333134235872 0.1760301841052652
0.0833333358693764 0.1666666716734966 0.2580528916967220
0.0833333357784838 0.4166666865085915 0.2580528916967220
0.0833333357905346 0.6666666865131106 0.2580528916967220
0.0833333358025783 0.9166666865176367 0.2580528916967220
0.3333333433092989 0.1666666716734966 0.2580528916967220
0.3333333432184062 0.4166666865085915 0.2580528916967220
0.3333333432304499 0.6666666865131106 0.2580528916967220
0.3333333432425007 0.9166666865176367 0.2580528916967220
0.5833333134713001 0.1666666716734966 0.2580528916967220
0.5833333134587164 0.4166666865085915 0.2580528916967220
```

0.5833333134707672 0.6666666865131106 0.2580528916967220  
0.5833333134828180 0.9166666865176367 0.2580528916967220  
0.8333333134713001 0.1666666716734966 0.2580528916967220  
0.8333333134587164 0.4166666865085915 0.2580528916967220  
0.8333333134707672 0.6666666865131106 0.2580528916967220  
0.8333333134828180 0.9166666865176367 0.2580528916967220  
0.833333358693764 0.1666666716734966 0.0940074764611785  
0.083333357784838 0.4166666865085915 0.0940074764611785  
0.833333357905346 0.6666666865131106 0.0940074764611785  
0.833333358025783 0.9166666865176367 0.0940074764611785  
0.3333333433092989 0.1666666716734966 0.0940074764611785  
0.3333333432184062 0.4166666865085915 0.0940074764611785  
0.3333333432304499 0.6666666865131106 0.0940074764611785  
0.3333333432425007 0.9166666865176367 0.0940074764611785  
0.5833333134713001 0.1666666716734966 0.0940074764611785  
0.5833333134587164 0.4166666865085915 0.0940074764611785  
0.5833333134707672 0.6666666865131106 0.0940074764611785  
0.5833333134828180 0.9166666865176367 0.0940074764611785  
0.8333333134713001 0.1666666716734966 0.0940074764611785  
0.8333333134587164 0.4166666865085915 0.0940074764611785  
0.8333333134707672 0.6666666865131106 0.0940074764611785  
0.8333333134828180 0.9166666865176367 0.0940074764611785

0.8339893728115901 0.9180910251539385 0.0970420855066582  
0.3340315045589036 0.4183557165387198 0.2276001918709193

**CONTCAR file of S<sub>vac</sub>-MoS<sub>2</sub> catalyst after relaxation**  
CONTCAR

1.0000000000000000  
12.7689514160000002 0.0000000000000000  
0.0000000000000000  
-6.3844771805000002 11.0582354558000002  
0.0000000000000000  
0.0000000000000000  
0.0000000000000000 0.0000000000000000  
19.0000000000000000  
Mo S  
16 31  
Direct

0.1675282714759343 0.0841428016215655 0.1771617437294324  
0.1675282714365063 0.3333854772930195 0.1771617437294324  
0.1663953066510003 0.5827905835488477 0.1764565158166783  
0.1663953066178322 0.8336046784039127 0.1764565158166783  
0.4182108638439014 0.0864216904555695 0.1749821962272911  
0.4210209594049262 0.3355104797114833 0.1732245529072163  
0.4182108638988974 0.5817891362000884 0.1749821962272911  
0.4172094164386537 0.8336046784039127 0.1764565158166783  
0.6666145524980265 0.0841428016215655 0.1771617437294324  
0.6644895500401418 0.3355104797114833 0.1732245529072163  
0.6644895501345587 0.5789790405996428 0.1732245529072163  
0.6666145524415383 0.8324717136023059 0.1771617437294324  
0.9166666865344908 0.083333358367483 0.1779162794950680  
0.9158572207102528 0.3333854772930195 0.1771617437294324  
0.9135783319706656 0.5817891362000884 0.1749821962272911  
0.9185722069318155 0.8324717136023059 0.1771617437294324  
0.8450059830457704 0.1672029952616936 0.2595609015829669  
0.0835814533001941 0.4171629215520124 0.2590321983619530  
0.0811308651517110 0.6655654511936987 0.2575255690544612  
0.0835814533242886 0.9164185689959263 0.2590321983619530  
0.3401469744983066 0.1730533618244218 0.2571825391320909  
0.3401469744074140 0.4170936275466742 0.2571825391320909  
0.3344345785498618 0.6655654511936987 0.2575255690544612  
0.3344345785619126 0.9188691571564604 0.2575255690544612  
0.5829063724332175 0.1730533618244218 0.2571825391320909  
0.5829063724326846 0.6598530553241029 0.2571825391320909  
0.58283707843393976 0.9164185689959263 0.2590321983619530  
0.8327969898831030 0.1672029952616936 0.2595609015829669  
0.8269466233077912 0.4170936275466742 0.2571825391320909  
0.8269466233198420 0.6598530553241029 0.2571825391320909  
0.8327969898946209 0.9155940393412426 0.2595609015829669  
0.0830023091070965 0.1665011582923566 0.0957139253013112  
0.0828105320599148 0.4156210790714536 0.0951206835595120  
0.0831244283053680 0.6665622327705273 0.0943684154966397  
0.0828105320840093 0.9171894902362056 0.0951206835595120  
0.3325689983330097 0.1682019211991983 0.0930656859223469  
0.3325689982421171 0.4143670920066007 0.0930656859223469  
0.3334377969730333 0.6665622327705273 0.0943684154966397  
0.3334377969850841 0.9168755940028034 0.0943684154966397  
0.5856329079732910 0.1682019211991983 0.0930656859223469  
0.5833333134587164 0.4166666865085915 0.0910649709303238  
0.5856329079727581 0.66743310314893996 0.0930656859223469  
0.5843789209199561 0.9171894902362056 0.0951206835595120  
0.8334988268524403 0.1665011582923566 0.0957139253013112  
0.8317980639330148 0.4143670920066007 0.0930656859223469  
0.8317980639450656 0.66743310314893996 0.0930656859223469  
0.8334988268639582 0.9169977132799165 0.0957139253013112

**CONTCAR file of N<sub>dop</sub>-S<sub>vac</sub>-MoS<sub>2</sub> catalyst after relaxation**  
CONTCAR

1.0000000000000000  
12.7689514160000002 0.0000000000000000  
0.0000000000000000  
-6.3844771805000002 11.0582354558000002  
0.0000000000000000  
0.0000000000000000  
0.0000000000000000 0.0000000000000000  
19.0000000000000000  
Mo S N  
16 30 1  
Direct

0.1689297119182593 0.0880219056484621 0.1787932881784480  
0.1735583711155670 0.3379220216374415 0.1782527135792755  
0.1689571626966105 0.5832589025735335 0.178823265048313  
0.1679500286234736 0.8350807897786343 0.1782165187671932  
0.4171749605840758 0.085489749477543 0.1773694025086145  
0.414191323771926 0.3379063888107914 0.1782543501548579

**CONTCAR file of N<sub>dop</sub>-MoS<sub>2</sub> catalyst after relaxation**  
CONTCAR

1.0000000000000000  
12.7689514160000002 0.0000000000000000  
0.0000000000000000  
-6.3844771805000002 11.0582354558000002  
0.0000000000000000  
0.0000000000000000  
19.0000000000000000  
Mo S N  
16 31 1  
Direct

0.1672686816888217 0.0848040587895598 0.1779897590649152  
0.1746701604384402 0.3385917149076036 0.1755775986037045  
0.167244397600885 0.5846560190536776 0.1779429177296742  
0.1671074278861435 0.8346677669787946 0.1787533718986161  
0.4171184856101367 0.0852143353581966 0.1786514951620103  
0.413676111721044 0.3386114678351367 0.1756055698777645  
0.4137024111826935 0.5776099558623889 0.1755338933495435  
0.4170693599282641 0.8341109887494320 0.1786377785258617  
0.6672242111502595 0.084676364030829 0.1790325415759726  
0.6668213801150897 0.3348591682306766 0.1786381737747324  
0.6672108913461406 0.5847101528634631 0.1779691217714603  
0.6668442408072123 0.8341550368900541 0.1786524030403772  
0.9178857961447981 0.0851887418321384 0.1786461788942617  
0.9178414228826273 0.33483070199735645 0.1786232512296220  
0.9173221234374228 0.5848415349886632 0.1787460742790289  
0.9173557404897638 0.8346655374365859 0.1787619609026744  
0.0879141004445528 0.1721991224159076 0.2593131543056985  
0.0878653318739111 0.4180628186129107 0.2593390445589555  
0.0842313957299708 0.6677974616048460 0.2605615843419782  
0.0842496383800399 0.9186667355119948 0.2605988304502307  
0.3340295283733587 0.1721853046609032 0.2593210075045559  
0.333975309891967 0.6641125433608732 0.2593092403934899  
0.3337761205874923 0.9180098933200844 0.2606960638970993  
0.5835691142677676 0.1684689710221907 0.2608206648628563  
0.5800278660912505 0.4180925424831636 0.2593451107128392  
0.5799420211704568 0.6641655734527970 0.2593261781789567  
0.5835183381276605 0.9172594222096377 0.2608224741569682  
0.8346820233712663 0.1684529639052701 0.2608181654278450  
0.8340507949033674 0.4182264263676395 0.2607060205282651  
0.8334151008247067 0.6678051088109765 0.2605836048465776  
0.8340596306163917 0.9180045414280620 0.2607085824930373  
0.0836485473709535 0.1678728261503139 0.0960082112251316  
0.0835930840521146 0.4180493116839062 0.0959413643611612  
0.0836633358655642 0.6683603857559997 0.0964429128401978  
0.0836876425883661 0.9175583572842305 0.09644390243982451  
0.3340040332657092 0.1679171291010156 0.0960287999921110  
0.3339917324321695 0.4182306855290865 0.0864392245254940  
0.3339595758586588 0.6684876805650434 0.0959268588977230  
0.3338982358894531 0.9180570965734890 0.0970340153395956  
0.5839272546723266 0.1680816571767545 0.0969867907713198  
0.5842763849455063 0.4180919548174200 0.0959938202192699  
0.5843635873609203 0.6685299566627499 0.0959653745355627  
0.5839214963534460 0.9180570965734890 0.0969736130184438  
0.8339083870600265 0.1680301058849080 0.0969723533327714  
0.8339581979441396 0.4180797553594946 0.0970111949164054  
0.8344968751626181 0.6683518916481554 0.0964465185536173

0.4142543263753892 0.5787603163969857 0.1782718614322044  
0.4172366772483901 0.8340134116861880 0.1774514984265544  
0.6672483199505495 0.0847066615099949 0.1770738055059373  
0.6665050854685948 0.3347467873033112 0.1773583597565664  
0.6640516140797799 0.5832289128153008 0.178863722312358  
0.6665401363263841 0.8339723916961429 0.1774550142323341  
0.9180976407938062 0.0854895224719494 0.1773650230366602  
0.9180447205293759 0.3347426856537724 0.1773463316264025  
0.9168860703275420 0.5839714362033115 0.1781873017443038  
0.9169370975919536 0.8350821205672491 0.1782166317151566  
0.0862694154147943 0.1727302363635606 0.2605384177731173  
0.0861978158818489 0.4157749119196343 0.2605321685015020  
0.0843961156230303 0.6675975622382592 0.2600042248155620  
0.0844726258174599 0.9191206142439117 0.2600238163690234  
0.3362859626157711 0.1727350629385133 0.2605468729493438  
0.3362608367686162 0.6658850019008079 0.2606039585785482  
0.3348482783139612 0.9185993695132033 0.2598240790428800  
0.5838803641995739 0.1680305641409791 0.2590495412301700  
0.5793796758104679 0.4157548775497354 0.2605623433639718  
0.5793651503112116 0.6658553988563871 0.2606507969192355  
0.5839626306901146 0.9181370855980377 0.2591457337414717  
0.8339595968760460 0.1680531531096283 0.2590443526100955  
0.8334344323719161 0.4170504876957054 0.2597495213851861  
0.8330171460229724 0.6676074761086694 0.2600223985931366  
0.8335364939927993 0.9186074178762526 0.2598145987080790  
0.0885545249810366 0.1730102594980495 0.0963842006681039  
0.0885914991794650 0.4179238428322600 0.0964045816670234  
0.0847715429605644 0.6672490327001142 0.0968550543557300  
0.0847896195584004 0.9197869197002719 0.0968404287881766  
0.3342740181435946 0.17301593359022984 0.0963751962686537  
0.3343047302854872 0.6636831807135338 0.0964257782818611  
0.3364408342745735 0.9179448609792344 0.0956848887403202  
0.5835929354819094 0.1683091740319064 0.0953059654171509  
0.5791480934284924 0.4179308021110085 0.0964256090730750  
0.5791365932609801 0.6636391277497736 0.0964298387428079  
0.5836269645154625 0.9174421010252587 0.0953470529101376  
0.8344957952780626 0.1682920283724978 0.0952962003954368  
0.8340423437264837 0.4183246737674527 0.0956307787753197  
0.8322228457421699 0.6672168974502345 0.0968860154955837  
0.8340450629689085 0.9178970818981572 0.0956917260806609  
0.334011573131170 0.4181990840017644 0.2256978340727880

**CONTCAR file of LiO<sub>2</sub> interaction with N<sub>dop</sub>-S<sub>vac</sub>-MoS<sub>2</sub>-N after relaxation**

CONTCAR

1.0000000000000000  
12.7689514160000002 0.0000000000000000  
0.0000000000000000  
-6.3844771805000002 11.0582354558000002  
0.0000000000000000  
0.0000000000000000 0.0000000000000000  
19.0000000000000000  
Mo S N O Li  
16 30 1 2 1  
Direct  
0.1716197754210544 0.0836193706712437 0.1828608968832467  
0.1699355225118204 0.3313384982762606 0.1821020170828340  
0.1714433496136547 0.5806936560217386 0.1825938840814455  
0.1706740110478543 0.8317029872134685 0.1825387888108622  
0.4195616964214639 0.0805583381107595 0.1821361032223077  
0.4211569358528915 0.3275890691328996 0.1838174712916945  
0.4211016281183969 0.5871331912575756 0.1831518078801173  
0.4194979718643759 0.8318519577458359 0.1820372955032153  
0.6705986530579721 0.0815250184697595 0.1820149335980135  
0.6709836800614405 0.33174653201764986 0.1823872048223417  
0.6685891869206960 0.58043324777460683 0.1824667295942336  
0.6708847845351876 0.8316917381236285 0.1825403420508908  
0.9210098840877886 0.0814882978723166 0.1818214599282181  
0.9209133801940037 0.3319835400788221 0.1817144947328769  
0.919957852890170 0.5807639614881510 0.1823987235113478  
0.9199804577923141 0.8317311181989039 0.1825201172726900  
0.0885633086785775 0.1682239028644390 0.2647880747510961  
0.0883882537873616 0.4131182548627564 0.2646753148502389  
0.0870460943491960 0.6641842389077163 0.2642064490056803  
0.0871393784734920 0.9155212266297351 0.2643651948570582  
0.3379097968303288 0.1650269927753002 0.2658131562548552  
0.3373359510168676 0.6656435439009230 0.2655678208078857  
0.336978467727784 0.9149273607403979 0.2646885262911629  
0.5872217655577382 0.1644118641418881 0.2638723847985578  
0.5867177185409365 0.4146646206857110 0.2657904767864440  
0.5864407235115520 0.6640323043996683 0.2657945236108099

0.5870325140991154 0.9153429160264391 0.2639268386434768  
0.83754421066633567 0.1650103584278350 0.2635760644135557  
0.8375775055676979 0.4142842402300008 0.2644768955543458  
0.8362350162442056 0.6642746440903627 0.2641259319753135  
0.8375888703075569 0.9158255453942558 0.2645655600435551  
0.0898035320265390 0.1677932836397678 0.0999323342421291  
0.0896139107686962 0.4143825293012152 0.0998017907293194  
0.0872562064867006 0.6643291021320704 0.1007954769277137  
0.0873822671988174 0.9159071007954626 0.1009608831797367  
0.3373960417239808 0.1667860679062688 0.0999265891249659  
0.3370456238199951 0.6638652215838584 0.0994316527503204  
0.3364302623505430 0.9147395898834374 0.0998884817820386  
0.5869814231821401 0.1648796932206242 0.1004480194399496  
0.5834988501098418 0.4128597796334648 0.1005019181670606  
0.5839686523195704 0.6635003890556563 0.1003517087785206  
0.5870751598837666 0.9146232934853648 0.1004775364001222  
0.8372483275027508 0.1647695842475985 0.1000293987065427  
0.8368851642887595 0.4147288714327304 0.0999269909816181  
0.8360397683940538 0.6643323781625418 0.1007393915891689  
0.8368622797045820 0.9146281816117735 0.1000908309645875  
0.3391389664835516 0.4164054678350541 0.2132494721561327  
0.3040876020980365 0.4464511092449938 0.4015213795341616  
0.3284212844760899 0.3588128356529177 0.4017817359670106  
0.3953878499785842 0.4554919333397073 0.3193450597566331

**CONTCAR file of Li<sub>2</sub>O<sub>2</sub> interaction with N<sub>dop</sub>-S<sub>vac</sub>-MoS<sub>2</sub>-N after relaxation**

CONTCAR

1.0000000000000000  
12.7689514160000002 0.0000000000000000  
0.0000000000000000  
-6.3844771805000002 11.0582354558000002  
0.0000000000000000  
0.0000000000000000 0.0000000000000000  
19.0000000000000000  
Mo S N Li O  
16 30 1 2 2  
Direct  
0.1789172919252272 0.0823701865047106 0.1840132966447158  
0.1735208750488889 0.3301369613818781 0.1842573629908313  
0.1786724883399674 0.5804780256053035 0.1838827918930012  
0.1782605897933507 0.8312705014990386 0.1837572648549236  
0.4272602290565434 0.0801908657359051 0.1837028319996374  
0.4303190354707674 0.3291270161969474 0.1860094548009764  
0.4270602788209601 0.5828130233147620 0.1846920474486115  
0.4270167124665171 0.8307887659492934 0.1833576376233801  
0.6779097929105083 0.0809120710513414 0.1835842648251866  
0.6788077257891000 0.3316274990167070 0.1834453211970491  
0.6762936688905392 0.5791187439471314 0.1834883360761870  
0.6783229858658611 0.8312531270062732 0.1840165920718129  
0.9280458576707923 0.0807508792427838 0.1840733271005610  
0.9278525519952934 0.3319363354842639 0.1833247971948824  
0.9277286878102192 0.5806742445001920 0.1838340361778812  
0.9274483099459193 0.8312438611610536 0.1840471452964761  
0.0958817767363194 0.1651490245125507 0.2672014247994381  
0.0944112550212244 0.4144211278737916 0.2666146339765899  
0.0949636769832590 0.6642953401456251 0.2655463676117020  
0.0948663521370673 0.9147645364828602 0.2656163448395090  
0.3446682601166347 0.1639172089267780 0.2673420734848477  
0.3449753593552970 0.6639784160275435 0.2665913472999728  
0.3445741144986968 0.914036913292598 0.2659371618433476  
0.5947821327286796 0.1642593663104609 0.2651891936802618  
0.5946660748495487 0.4130147399590530 0.2671405147376243  
0.5930236162064720 0.6631860000307888 0.2663198248454511  
0.5940294819859571 0.9144103534109774 0.265352166035572  
0.8444049689384382 0.1648203751587049 0.2653064971123192  
0.8446465771111223 0.4142979414864835 0.2659053986257592  
0.8440895315167404 0.6638997189889737 0.2657993485062525  
0.8443768325660510 0.9144737490720467 0.2662765031066171  
0.0962047305424964 0.1670655977192643 0.1016902552585145  
0.0961205609059716 0.4143814727841714 0.1008859544572920  
0.0948337704801055 0.6641343009257489 0.1020274004097549  
0.0946524282380996 0.9151231538760868 0.1022027608432969  
0.34959166508119770 0.1670446871926243 0.1016902552585145  
0.3448199975894093 0.6620906648725715 0.1011637986813480  
0.3442839027718193 0.9143548628996041 0.1012719397773782  
0.5943970920509327 0.1641815685662189 0.1018541160654725  
0.5919765551420894 0.4130835409347412 0.1016604583379027  
0.5910432667059371 0.6617124604349999 0.1023624793853948  
0.5945350308579173 0.9139573365890178 0.1019035094271961  
0.8448764630827391 0.1642399984414677 0.1019548742250463

0.8447103210246467 0.4148882627060841 0.1011694172487844  
0.84332824864760262 0.6638407287226537 0.1023473979940406  
0.8444285066070745 0.9144697292926953 0.1018281753824167  
0.3435877886700059 0.4129127369802092 0.2152325023446402  
0.2868385706813051 0.3522802564881493 0.3284409335675962  
0.5206854449077909 0.5907836356316848 0.3869992214668425  
0.3568853902186360 0.4884034121209558 0.3863174508213134  
0.4231474202039742 0.4266848614887296 0.3856273467549759

0.5628793395156954 0.5818142179139798 0.4906708324722401  
0.4976197257618367 0.6367650797500062 0.4902975210752766

**CONTCAR file of Li<sub>4</sub>O<sub>4</sub> interaction with N<sub>dop</sub>-S<sub>vac</sub>-MoS<sub>2</sub>-N after relaxation**

CONTCAR  
1.0000000000000000  
12.7689514160000002 0.0000000000000000  
0.0000000000000000  
-6.3844771805000002 11.0582354558000002  
0.0000000000000000  
0.0000000000000000 0.0000000000000000  
19.0000000000000000

Mo S N Li O  
16 30 1 4 4  
Direct  
0.1825187898907597 0.0860056079506435 0.1832977740887712  
0.1767950297195226 0.3328196877482411 0.1836174565164016  
0.1821765806096474 0.5838460868603057 0.1829716990717007  
0.1818218201506761 0.8347081431557928 0.1829828080689312  
0.4307828424927801 0.0837620075696706 0.1829218055760871  
0.4338255643519931 0.3325912134339533 0.1847191100941285  
0.43158499024793837 0.5874680131331617 0.1837383419558843  
0.4306112370778686 0.8343452233097695 0.182519111317791  
0.6814589063630279 0.0843831941246327 0.1829450911702553  
0.6823138198528953 0.3351398524571931 0.1827254561089036  
0.68028499024793837 0.5874680131331617 0.1837383419558843  
0.6822015862055201 0.8349704836267265 0.1830536367462972  
0.9318284369963504 0.0841547620174847 0.1833376547358346  
0.9315036248148519 0.3354285477896184 0.1826922630722158  
0.9312918013011297 0.5841285564927233 0.1830024892653764  
0.9311319684044486 0.8347017303621671 0.1831930058622206  
0.0995168388974586 0.1686689305855769 0.2666415229384611  
0.0981782127886223 0.4180018009403061 0.2658814389713077  
0.0985239845851246 0.6676137781678019 0.2646881382671321  
0.0985131314748464 0.9182998141433653 0.264817200871055  
0.3485244413608477 0.1679909325209653 0.2664855131639517  
0.3482565440578149 0.6676436591484316 0.2656876622912049  
0.3481439412776516 0.9175243118283221 0.2650975139486190  
0.5982764419319739 0.1678288878778765 0.2644752052655703  
0.5980846040775925 0.4169520251254284 0.2661280473190891  
0.5979369865045563 0.6671761015166960 0.2651314038465911  
0.5976705773793776 0.9177740146341361 0.2645365976200237  
0.8481562556311503 0.1682368322165863 0.2646282154778991  
0.8482050628588541 0.4178220779092636 0.2651420949239819  
0.8477031901909116 0.6673156499284820 0.2648331095647656  
0.8481470288389708 0.9179512796638285 0.2654304073604790  
0.0998392583918559 0.1703179968459393 0.1007952000392189  
0.0996802634983059 0.4173709644244223 0.1001610053471755  
0.0984370300915537 0.6675809174594272 0.1012175348383213  
0.0984240421165446 0.9187225783017914 0.1014248112892251  
0.3493434953183440 0.1709819199386835 0.1009101422105085  
0.3485691377194077 0.6657234652191643 0.1001608428398198  
0.3478283993846416 0.9179330394548387 0.1004821407310158  
0.5980299501766273 0.1677062687363086 0.10119038680020505  
0.5951049072444454 0.4164982120565283 0.1006096844134051  
0.5951422186815729 0.66571611040878398 0.101134166997282  
0.5982353553753607 0.9176528700394260 0.1011051841535305  
0.8485500814091700 0.1677715475831080 0.1013594914818886  
0.8482721788662568 0.4182098705830092 0.1004333750303945  
0.847414832977746 0.6675325032918793 0.1013199131679546  
0.8483351441902541 0.9181762663925885 0.1009320417367780  
0.3474734612110242 0.4170106326233175 0.213758284172613  
0.3024522324455550 0.3677365115886601 0.3235308980299082  
0.4985494752016276 0.5742792532894476 0.3746574023493222  
0.2643943860686833 0.4650081141376567 0.4803882734853080  
0.3949476250545804 0.3497633908102059 0.4863381988438327  
0.3383474524239338 0.4809176756397555 0.3935957892755875  
0.4123214775986286 0.4148457112849704 0.3965349714567660  
0.2567995572987385 0.3347775098045234 0.5317118578707566  
0.3594535997463201 0.4431995917956052 0.5497958719342732

**CONTCAR file of Li<sub>3</sub>O<sub>4</sub> interaction with N<sub>dop</sub>-S<sub>vac</sub>-MoS<sub>2</sub>-N after relaxation**

CONTCAR  
1.0000000000000000  
12.7689514160000002 0.0000000000000000  
0.0000000000000000  
-6.3844771805000002 11.0582354558000002  
0.0000000000000000  
0.0000000000000000 0.0000000000000000  
19.0000000000000000

Mo S N Li O  
16 30 1 3 4  
Direct  
0.1786373889730941 0.0819005254708032 0.1846015425205942  
0.1726597019463730 0.3294528750538221 0.1843238640281685  
0.1782930958535126 0.5794695247816007 0.1847864240110724  
0.1778799553535830 0.8304402618117552 0.1848593505976545  
0.4268835571659343 0.0793004168312548 0.1846556462622399  
0.4306583503610500 0.3282152383024784 0.1862126652804884  
0.4263671762008950 0.5817583518396224 0.1845846396114401  
0.4265962858385217 0.8299057707832780 0.1841886823394865  
0.6775060974406779 0.0800866569662477 0.1845995262608690  
0.6784976316675725 0.3309131850190130 0.1844183842582311  
0.6755509557102116 0.5781806780945755 0.1852104574301658  
0.6776469017917000 0.8301812170779623 0.1848301908293690  
0.9275421780387663 0.0798412487595929 0.1848319751706242  
0.9273980327145163 0.3311748710892948 0.1841625021643202  
0.9272156626044923 0.5798107072920170 0.1850097324340906  
0.9269065372458738 0.8303709409733685 0.1851044174350064  
0.0956858413689378 0.1649350551247330 0.2676315172081960  
0.0941198925234205 0.4130496135483941 0.2673304386788400  
0.0946522272594547 0.6633160558132952 0.2666614161904464  
0.0946429054488713 0.9145168296416897 0.2665081401381781  
0.3443520206388136 0.1634980844437380 0.2679673811772121  
0.3450415860739599 0.6627439552486394 0.2672147187320115  
0.3442561550661740 0.9130952902975462 0.2669815936008867  
0.5944033796496172 0.1634723899546987 0.2662367951848918  
0.5938704986648019 0.4122169951680301 0.26800558241741028  
0.5912955699904844 0.6615629105396058 0.2668888943095167  
0.5935496029583723 0.9134028756108733 0.2663025640504149  
0.8441955583940676 0.1640305258555185 0.2662258514847414  
0.8442002908847975 0.4133201902812385 0.2669972711659634  
0.8432927775136220 0.6629520503296910 0.2668821202482775  
0.8437373488126861 0.9136113516414961 0.2672094391468366  
0.0953107643432232 0.1659750284246714 0.1021861601530111  
0.0951829113449448 0.4138808081739797 0.1014121640323286  
0.0942979567244896 0.6633446361257166 0.1031747815439419  
0.0941705230122617 0.9140968056217038 0.1031995438364729  
0.3458285821888933 0.1665748985887334 0.1024345756675824  
0.3441050784301704 0.6616516201551439 0.1017331233218546  
0.343771852102004 0.9134956687376790 0.1022676923080799  
0.5941063203259751 0.1633715113426285 0.1028736590170739  
0.5917962166266482 0.4125053593487804 0.1022188353986939  
0.5909600710839994 0.6611308043833349 0.1029054644498950  
0.5942089717229410 0.913327885768779 0.1028040970945372  
0.8442501915377748 0.1633814711198288 0.1028537022779806  
0.8443363516739968 0.4142773775605827 0.1021466555290804  
0.8430827395267707 0.6631005459946430 0.1034333134731360  
0.8439069966097760 0.91342244474693615 0.1027456332770901  
0.3431694746127025 0.4117844707578958 0.2145792368557014  
0.3003135498999549 0.3626934638259855 0.3219924121926768  
0.5078739602492224 0.5850845139021681 0.3881841142687432  
0.3834444596022763 0.4538812236852917 0.4837524159994562  
0.3375833666809263 0.4739431515019855 0.3942172256201044  
0.4118344141405568 0.4131273591929448 0.3946111080661685
